# Supplementary material for: A Retrospective Study of Staphylococcus aureus Bacteremia in a Tertiary Hospital and Factors Associated with Mortality
Source: MDPI journal article supplement (doi:10.3390/diagnostics13111975), 2023-06-05
Supplement: s1 [file s1]

**Table S1.** STROBE information for the study regarding methods and the results.

| Methods                      |                                                                                                                                                                                                                                                                                                                                                                                                                                                                                                                                                                                                                                                                                                                                                                                                                                                                                                                                                                                 |
|------------------------------|---------------------------------------------------------------------------------------------------------------------------------------------------------------------------------------------------------------------------------------------------------------------------------------------------------------------------------------------------------------------------------------------------------------------------------------------------------------------------------------------------------------------------------------------------------------------------------------------------------------------------------------------------------------------------------------------------------------------------------------------------------------------------------------------------------------------------------------------------------------------------------------------------------------------------------------------------------------------------------|
| Study design                 | Observational, retrospective, descriptive study                                                                                                                                                                                                                                                                                                                                                                                                                                                                                                                                                                                                                                                                                                                                                                                                                                                                                                                                 |
| Setting                      | Patients hospitalized in the University Hospital of Heraklion, Greece                                                                                                                                                                                                                                                                                                                                                                                                                                                                                                                                                                                                                                                                                                                                                                                                                                                                                                           |
| Participants                 | Patients with <i>Staphylococcus aureus</i> bacteremia (at least one positive blood culture for this pathogen)                                                                                                                                                                                                                                                                                                                                                                                                                                                                                                                                                                                                                                                                                                                                                                                                                                                                   |
| Variables                    | <ul style="list-style-type: none"> <li>Record of outcomes of <i>S. aureus</i> bacteremia</li> <li>Record of demographic characteristics, clinical values, comorbidities, microbiological characteristics, and antimicrobial treatment</li> </ul>                                                                                                                                                                                                                                                                                                                                                                                                                                                                                                                                                                                                                                                                                                                                |
| Data sources/<br>measurement | <ul style="list-style-type: none"> <li>Data of patients with <i>S. aureus</i> derived from the microbiology laboratory</li> <li>The rest of the patients' data derived from the hard copies and the electronical medical records of the hospital</li> </ul>                                                                                                                                                                                                                                                                                                                                                                                                                                                                                                                                                                                                                                                                                                                     |
| Study size                   | Target population: all patients with <i>S. aureus</i> bacteremia                                                                                                                                                                                                                                                                                                                                                                                                                                                                                                                                                                                                                                                                                                                                                                                                                                                                                                                |
| Bias                         | Diligence regarding informing patients' file in hard copies and the electronic medical records<br>Recording demographics and medication regimens<br>Analysis of data regarding the significance                                                                                                                                                                                                                                                                                                                                                                                                                                                                                                                                                                                                                                                                                                                                                                                 |
| Statistical methods          | <ul style="list-style-type: none"> <li>Categorical data were analyzed with Fisher's exact test</li> <li>Continuous variables were compared using the Mann-Whitney U-test for non-normally distributed variables</li> <li>All tests were two-tailed and a p-value equal or lower than 0.05 was considered significant</li> <li>Data are presented as numbers (%) for categorical variables and medians (interquartile range) or means (+/- standard deviation) for continuous variables</li> <li>A linear-regression analysis model was developed to evaluate the effect of several parameters with in-hospital mortality</li> <li>A multivariate logistic-regression analysis model was developed to evaluate the association of factors identified in the univariate analysis with a p lower than or equal to 0.1 with mortality. For multivariate analysis a p-value equal or lower than 0.05 was considered significant (along with a confidence interval of 95%)</li> </ul> |
| Results                      |                                                                                                                                                                                                                                                                                                                                                                                                                                                                                                                                                                                                                                                                                                                                                                                                                                                                                                                                                                                 |
| Participants                 | 256 patients were enrolled in the present study                                                                                                                                                                                                                                                                                                                                                                                                                                                                                                                                                                                                                                                                                                                                                                                                                                                                                                                                 |
| Descriptive data             | <ul style="list-style-type: none"> <li>Median age of 72 years and 101 (39.5%) were female</li> <li>Positive blood culture drawn in a medical ward (80.5%), surgical ward (13.5%) and the ICU (6%)</li> <li>Bacteremia was community-acquired in 49.5%</li> <li><i>S. aureus</i> was methicillin-resistant in 37.9%</li> <li>A repeat blood culture was taken in 14.4% after initiation of antimicrobial treatment</li> <li>Median duration of stay in the hospital was 20 days</li> </ul>                                                                                                                                                                                                                                                                                                                                                                                                                                                                                       |

|              |                                                                                                                                                                                                                                                                                                                                                                                                                                                                                                                                                                                                                                                                                                                                                                                                                                                                                                                                                                                                                    |
|--------------|--------------------------------------------------------------------------------------------------------------------------------------------------------------------------------------------------------------------------------------------------------------------------------------------------------------------------------------------------------------------------------------------------------------------------------------------------------------------------------------------------------------------------------------------------------------------------------------------------------------------------------------------------------------------------------------------------------------------------------------------------------------------------------------------------------------------------------------------------------------------------------------------------------------------------------------------------------------------------------------------------------------------|
| Outcome data | <ul style="list-style-type: none"> <li>• In-hospital mortality was 15.9%</li> </ul>                                                                                                                                                                                                                                                                                                                                                                                                                                                                                                                                                                                                                                                                                                                                                                                                                                                                                                                                |
| Main results | <ul style="list-style-type: none"> <li>• Female gender (<math>p=0.0386</math>), higher age (<math>p=0.001</math>), higher McCabe score (<math>p=0.0002</math>), previous antimicrobial use (<math>p=0.0401</math>), presence of a CVC (<math>p=0.0009</math>), neutropenia (<math>p=0.0102</math>), severe sepsis (<math>p&lt;0.0001</math>), septic shock (<math>p&lt;0.0001</math>), and bacteremia by methicillin-resistant <i>S. aureus</i> (<math>p=0.03</math>) were positively associated, while monomicrobial bacteremia (<math>p=0.0055</math>) was negatively associated with in-hospital mortality in the univariate regression analysis</li> <li>• The multivariate logistic-regression model identified only severe sepsis (<math>p = 0.05</math>, odds ratio = 12.294 (95% confidence intervals 1.005-150.354) and septic shock (<math>p = 0.007</math>, odds ratio 57.18, 95% confidence intervals 3.051-1,071.664) to be independently positively associated with in-hospital mortality</li> </ul> |

**Table S2.** Medical conditions of patients with *Staphylococcus aureus* bacteremia.

| Characteristic              | N (%)     |
|-----------------------------|-----------|
| Hypertension                | 84 (45.7) |
| Diabetes                    | 59 (32.1) |
| Kidney disease              | 46 (25)   |
| Smoking                     | 33 (17.9) |
| Malignancy                  | 31 (16.8) |
| Chronic pulmonary disease   | 30 (16.3) |
| Coronary artery disease     | 26 (14.1) |
| Hypothyroidism              | 19 (10.3) |
| Rheumatologic disease       | 18 (9.8)  |
| Congestive heart failure    | 17 (9.2)  |
| Dementia                    | 17 (9.2)  |
| Peripheral vascular disease | 16 (8.7)  |
| Cerebrovascular disease     | 14 (7.6)  |
